# Supplementary material for: Metal-involving halogen bond Ar–I⋯[dz2PtII] in a platinum acetylacetonate complex
Source: Royal Society of Chemistry journal article supplement (doi:10.1039/c9ce01568j), 2019-11-19
Supplement: c9ce01568j1.pdf [file c9ce01568j1.pdf]

## Electronic Supplementary Information

### **Metal-involving Halogen Bond Ar–I⋯[d<sub>z</sub><sup>2</sup>Pt<sup>II</sup>] in the Platinum Acetylacetonate Complex**

Anton V. Rozhkov,<sup>a</sup> Daniil M. Ivanov,<sup>a</sup> Alexander S. Novikov,<sup>a</sup> Ivan V. Ananyev,<sup>b</sup>

Nadezhda A. Bokach,<sup>a\*</sup> Vadim Yu. Kukushkin<sup>a,c\*</sup>

(a) Institute of Chemistry, Saint Petersburg State University, Universitetskaya Nab. 7/9, 199034 Saint Petersburg, Russian Federation

(b) A. N. Nesmeyanov Institute of Organoelement Compounds, Russian Academy of Sciences, Vavilova St., 28, 119991 Moscow, Russian Federation

(c) Institute of Macromolecular Compounds, Russian Academy of Sciences, Bolshoi Pr., 31, 199004 Saint Petersburg, Russian Federation

E-mails: [n.bokach@spbu.ru](mailto:n.bokach@spbu.ru) and [v.kukushkin@spbu.ru](mailto:v.kukushkin@spbu.ru)

## Table of Contents

|                                                                                                              |    |
|--------------------------------------------------------------------------------------------------------------|----|
| Variable-temperature XRD studies of the $[\text{Pt}(\text{acac})_2] \cdot 2(1,3,5\text{-FIB})$ complex. .... | 3  |
| XRD study of the $[\text{Pd}(\text{acac})_2] \cdot (1,3,5\text{-FIB})$ complex. ....                         | 8  |
| Theoretical Study on Noncovalent Interactions .....                                                          | 10 |

## ***Variable-temperature XRD studies of the [Pt(acac)<sub>2</sub>]<sub>2</sub>•2(1,3,5-FIB) complex***

**Table S1.** Main crystallography data and refinement details for [Pt(acac)<sub>2</sub>]<sub>2</sub>•2(1,3,5-FIB) crystal.

|                                                                                       |                                                                                 |              |              |              |              |
|---------------------------------------------------------------------------------------|---------------------------------------------------------------------------------|--------------|--------------|--------------|--------------|
| Formula                                                                               | C <sub>22</sub> H <sub>14</sub> F <sub>6</sub> I <sub>6</sub> O <sub>4</sub> Pt |              |              |              |              |
| Mass                                                                                  | 1412.82                                                                         |              |              |              |              |
| Crystal system                                                                        | Monoclinic                                                                      |              |              |              |              |
| Space group                                                                           | P2 <sub>1</sub> /c                                                              |              |              |              |              |
| Z (Z')                                                                                | 2 (0.5)                                                                         |              |              |              |              |
| T, K                                                                                  | 100                                                                             | 150          | 200          | 250          | 300          |
| a, Å                                                                                  | 12.1215(4)                                                                      | 12.1462(4)   | 12.1714(4)   | 12.2003(4)   | 12.2282(5)   |
| b, Å                                                                                  | 17.8414(6)                                                                      | 17.8660(6)   | 17.8866(6)   | 17.9075(7)   | 17.9253(7)   |
| c, Å                                                                                  | 7.3462(2)                                                                       | 7.3776(2)    | 7.4115(3)    | 7.4507(3)    | 7.4916(3)    |
| α, °                                                                                  | 90                                                                              | 90           | 90           | 90           | 90           |
| β, °                                                                                  | 99.7390(10)                                                                     | 99.8480(10)  | 99.9090(10)  | 99.9350(10)  | 99.9410(10)  |
| γ, °                                                                                  | 90                                                                              | 90           | 90           | 90           | 90           |
| V, Å <sup>3</sup>                                                                     | 1565.83(9)                                                                      | 1577.38(9)   | 1589.45(10)  | 1603.40(10)  | 1617.46(11)  |
| d <sub>calc</sub> , g·cm <sup>-3</sup>                                                | 2.997                                                                           | 2.975        | 2.952        | 2.926        | 2.901        |
| F(000)                                                                                | 1256                                                                            | 1256         | 1256         | 1256         | 1256         |
| 2θ <sub>max</sub> , °                                                                 | 60                                                                              | 60           | 60           | 60           | 60           |
| Reflections measured                                                                  | 20716                                                                           | 20875        | 21044        | 21187        | 21368        |
| Independent reflections                                                               | 4556                                                                            | 4595         | 4636         | 4679         | 4716         |
| Reflections with I>2σ(I)                                                              | 4234                                                                            | 4208         | 4090         | 4059         | 3899         |
| Number of parameters                                                                  | 180                                                                             | 180          | 180          | 180          | 180          |
| R <sub>1</sub>                                                                        | 0.0219                                                                          | 0.0228       | 0.0269       | 0.0286       | 0.0314       |
| wR <sub>2</sub>                                                                       | 0.0470                                                                          | 0.0489       | 0.0561       | 0.0596       | 0.0769       |
| GOF                                                                                   | 1.105                                                                           | 1.143        | 1.211        | 1.260        | 1.055        |
| Residual electron density,<br>e·Å <sup>-3</sup> (d <sub>min</sub> /d <sub>max</sub> ) | 0.688/-1.109                                                                    | 0.733/-1.144 | 0.779/-1.385 | 0.853/-1.480 | 0.700/-1.564 |

According to the VT-XRD data the crystal of  $[\text{Pt}(\text{acac})_2] \cdot 2(1,3,5\text{-FIB})$  follows smooth anisotropic expansion upon heating (see **Fig. S1** and **Table S2**) and no structural phase transitions were observed within the studied temperature range (100–300 K, 5 XRD experiments with 50 K per step). It is in line with only slight changes of noncovalent interaction angles upon heating (the maximal change is less than  $2.1^\circ$ , see **Table S2**) which could be attributed to variation of bonding pattern peculiarities. **Table S3** summarizes data on thermally induced changes of the shortened intermolecular contacts in  $[\text{Pt}(\text{acac})_2] \cdot 2(1,3,5\text{-FIB})$ .

**Figure S1.** Plots of unit cell parameters and volume temperature evolution for  $[\text{Pt}(\text{acac})_2] \cdot 2(1,3,5\text{-FIB})$ .

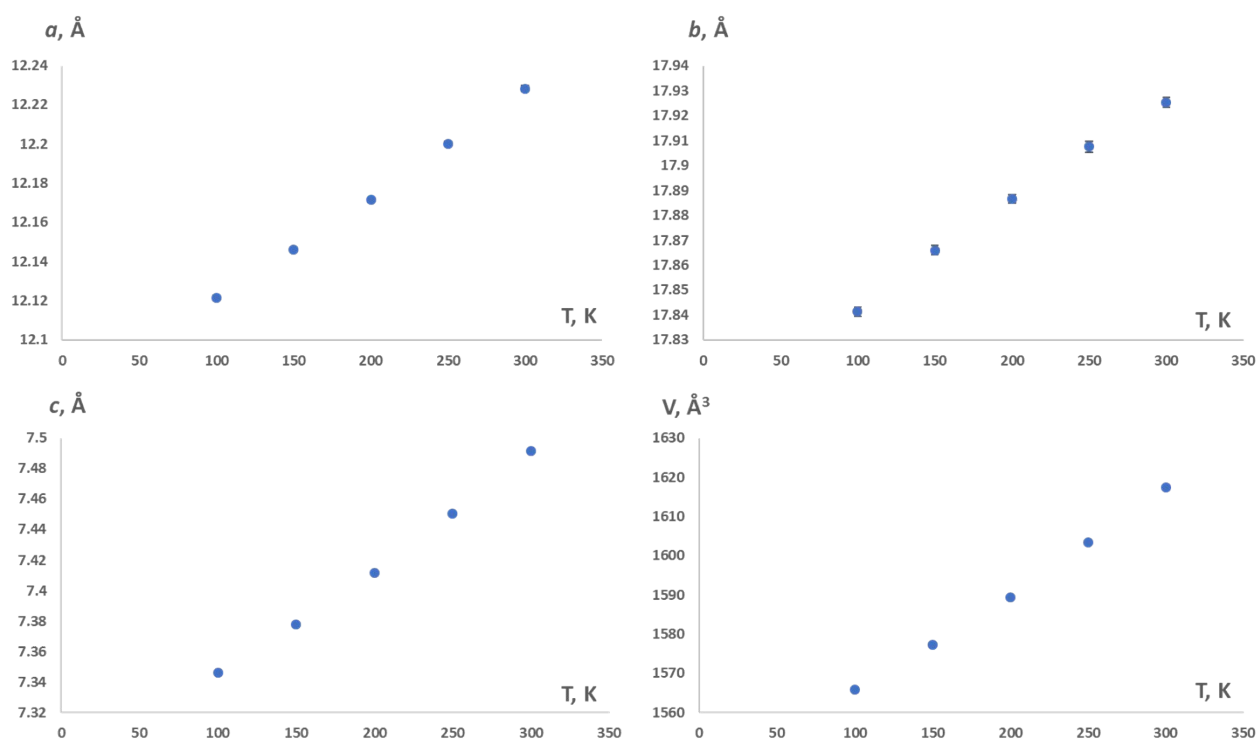

**Table S2.** The variation of unit cell parameters of  $[\text{Pt}(\text{acac})_2] \cdot 2(1,3,5\text{-FIB})$  according to VT-XRD.

| Temperature | $a$ , Å    | $b$ , Å    | $c$ , Å   | $\beta$ , ° | $V$ , Å <sup>3</sup> |
|-------------|------------|------------|-----------|-------------|----------------------|
| 100         | 12.1215(4) | 17.8414(6) | 7.3462(2) | 99.739(1)   | 1565.83(9)           |
| 150         | 12.1462(4) | 17.8660(6) | 7.3776(2) | 99.848(1)   | 1577.38(9)           |
| 200         | 12.1714(4) | 17.8866(6) | 7.4115(3) | 99.909(1)   | 1589.45(10)          |
| 250         | 12.2003(4) | 17.9075(7) | 7.4507(3) | 99.935(1)   | 1603.40(10)          |
| 300         | 12.2282(5) | 17.9253(7) | 7.4916(3) | 99.941(1)   | 1617.46(11)          |
| $\Delta^a$  | 0.1067     | 0.0839     | 0.1454    | 0.202       | 51.63                |

a – difference between data at 300 and 100 K.

Two XBs patterns formed by the I1S and I2S atoms exhibit dramatically different temperature induced changes though both can be attributed to bifurcate XBs, at least geometrically. Surprisingly, the most conservative I1S···O2 geometric contact (lengthening on 0.012 Å upon heating with 3.374 Å at 100 K) is characterized by a rather small interaction angle (the O2···I1S–C2S angle changes from 144.1(3) to 145.8(3)° upon heating), which is nearly inappropriate to classify this contact as directed XB. The more directed (165.9(3)–164.1(4)°) and stronger (3.094–3.175 Å) counterpart of the corresponding bifurcate XB pattern, namely, the I1S···O1 contact lengthens to a significantly larger extent (on 0.081 Å). Thus, the interplay between two interactions is observed: while the weakening of the strong I1S···O1 interaction destabilizes crystal packing, the compensation is achieved by the rigidity of the weak I1S···O2 interaction. This is not the case, however, of the second bifurcate XB involving the metal atom. The I2S···O2 contact, being of the similar geometric characteristics with the I1S···O2 one at 100 K (3.370 Å, the O2···I2S–C4 angle is 153.7(3)°), weakens to a significantly larger extent upon heating (on 0.078 Å). This can be rationalized by a three-center nature of XB formed by the I2S atom and involving the metal center. Assuming the leading role of the I2S···Pt1 contact in the formation of bifurcate XB, one can expect that the weakening of the I2S···Pt1 interaction must be accompanied by the weakening of the I2S···O2 interaction. Indeed, though corresponding to the most directed intermolecular interaction in [Pt(acac)<sub>2</sub>]<sub>2</sub>•2(1,3,5-FIB) (the Pt1···I2SC4S angle is in the 168.8(3)–168.5(3)° range), the I2S···Pt1 contact still lengthens significantly on 0.058 Å. Finally, a relatively large strength of the XB between the I3S atoms, which can be supposed by the comparison of the I3S···I3S distance with I···I distances in CSD structures stabilized by XBs of Type I,<sup>35</sup> agrees well with a rather insignificant lengthening (on 0.064 Å) upon heating.

The other shortened contact in the crystal packing of [Pt(acac)<sub>2</sub>]<sub>2</sub>•2(1,3,5-FIB) were found to be more flexible with respect to the temperature change. The H2A···I2S distance corresponding to the H-bond increases on 0.115 Å upon heating (with the C–H bond length being normalized on the ideal value). The largest changes are observed for the stacking interaction between acetylacetonate ligands. The corresponding interplane distance increases on 0.147 Å while the area of overlap of two fragments participating in stacking interaction decreases that follows from even more pronounced lengthening of the shortest intermolecular distance between these fragments (C1···C2 on 0.169 Å).

**Table S3.** The thermally induced changes of main geometric characteristics of shortened intermolecular contacts in [Pt(acac)<sub>2</sub>]**•**2(1,3,5-FIB).

| Temperature                | 100    | 150    | 200    | 250    | 300    | $\Delta^a$ |
|----------------------------|--------|--------|--------|--------|--------|------------|
| Pt1...I2S, Å               | 3.408  | 3.421  | 3.434  | 3.450  | 3.466  | 0.058      |
| Pt1–I2S–C4S, °             | 168.83 | 168.70 | 168.69 | 168.75 | 168.46 | -0.37      |
| O2...I2S, Å                | 3.370  | 3.388  | 3.403  | 3.424  | 3.448  | 0.078      |
| O2–I2S–C4S, °              | 153.72 | 153.45 | 153.32 | 153.20 | 153.17 | -0.55      |
| O1...I1S, Å                | 3.094  | 3.114  | 3.135  | 3.156  | 3.175  | 0.081      |
| O1–I1S–C2S, °              | 165.93 | 165.38 | 164.80 | 164.29 | 164.08 | -1.85      |
| O2...I1S, Å                | 3.374  | 3.371  | 3.375  | 3.379  | 3.386  | 0.012      |
| O2–I1S–C2S, °              | 144.12 | 144.65 | 145.23 | 145.69 | 145.88 | 1.76       |
| H2A...I2S, Å               | 3.024  | 3.047  | 3.072  | 3.104  | 3.139  | 0.115      |
| C2–H2A–I2S, °              | 162.90 | 162.34 | 161.90 | 161.69 | 160.84 | -2.06      |
| interplane, <sup>b</sup> Å | 3.349  | 3.386  | 3.428  | 3.466  | 3.496  | 0.147      |
| C1...C2, Å                 | 3.398  | 3.440  | 3.488  | 3.533  | 3.567  | 0.169      |
| I3S...I3S, Å               | 3.594  | 3.608  | 3.624  | 3.640  | 3.658  | 0.064      |
| C6S–I3S–I3S, °             | 146.76 | 147.17 | 147.45 | 147.70 | 147.84 | 1.08       |

a – difference between data at 300 and 100 K; b – the distance between mean-square planes based on the O1, C1, C2, C3 and O2 atoms of two acetylacetonate ligands participated in a stacking interaction.

Thus, the XBs formed by 1,3,5-FIB were found to be pronouncedly more conservative with respect to changes of external conditions than all other interactions observed in crystal packing of [Pt(acac)<sub>2</sub>]**•**2(1,3,5-FIB). This is also supported by the analysis of Hirshfeld surfaces calculated at 100 and 300 K (**Table S4**). In terms of contributions of different intermolecular contacts into the molecular Hirshfeld surface, the least changes are again observed mainly for the contacts formed by the iodine atoms of 1,3,5-FIB. Moreover, the molecular volume of the 1,3,5-FIB, calculated as the volume enclosed by the corresponding molecular Hirshfeld surface, increases to a less extent upon heating than that of the Pt(acac)<sub>2</sub> moiety (on 7.44 and 10.79 Å<sup>3</sup>, respectively, **Table S5**).

The distribution of thermally induced changes of intermolecular interactions agrees well with the anisotropy of crystal thermal expansion (**Table S2**). While the XBs in the crystal of [Pt(acac)<sub>2</sub>]**•**2(1,3,5-FIB) are formed in the *ab* plane of unit cell, the stacking interactions and hydrogen bonds stabilize crystal packing in the direction parallel to the *c* vector. In its turn, the *c* parameter increases on 0.1454 Å upon heating while the parameters *a* and *b* change less significantly (on 0.1067 and 0.0839 Å, respectively).

**Table S4.** The contribution of intermolecular contacts into molecular Hirshfeld surface for the Pt(acac)<sub>2</sub> and FIB moieties of [Pt(acac)<sub>2</sub>]<sub>2</sub>•2(1,3,5-FIB) at 100 and 300 K. The boldface is used to highlight contacts which can in principle be considered as manifestation of intermolecular interactions leading to charge transfer on iodine atoms.

| Pt(acac) <sub>2</sub> |         |           |      | FIB           |         |           |      |
|-----------------------|---------|-----------|------|---------------|---------|-----------|------|
| Contact               | T=100 K | T = 300 K | Δ    | Contact       | T=100 K | T = 300 K | Δ    |
| Pt···H                | 0.9     | 0.7       | -0.2 | C···C         | 9.5     | 9.2       | -0.3 |
| <b>Pt···I</b>         | 2.0     | 2.1       | 0.1  | C···H         | 0.1     | 0.1       | 0.0  |
| <b>O···I</b>          | 10.1    | 10.0      | -0.1 | <b>C···I</b>  | 1.7     | 1.7       | 0.0  |
| O···H                 | 7.6     | 7.3       | -0.3 | C···F         | 4.2     | 4.1       | -0.1 |
| C···C                 | 1.2     | 0.9       | -0.3 | <b>I···Pt</b> | 1.3     | 1.4       | 0.1  |
| C···H                 | 3.2     | 3.4       | 0.2  | <b>I···O</b>  | 8.0     | 8.0       | 0.0  |
| <b>C···I</b>          | 2.0     | 1.9       | -0.1 | <b>I···C</b>  | 3.2     | 3.2       | 0.0  |
| C···F                 | 1.7     | 1.5       | -0.2 | I···H         | 24.1    | 24.5      | 0.4  |
| H···F                 | 19.0    | 19.4      | 0.4  | <b>I···I</b>  | 6.7     | 6.6       | -0.1 |
| H···I                 | 17.4    | 18.1      | 0.7  | <b>I···F</b>  | 10.2    | 10.2      | 0.0  |
| H···H                 | 26.2    | 26.2      | 0.0  | F···F         | 5.6     | 5.8       | 0.2  |
| H···C                 | 3.2     | 3.4       | 0.2  | <b>F···I</b>  | 5.3     | 5.3       | 0.0  |
| H···O                 | 5.4     | 5.1       | -0.3 | F···H         | 15.4    | 15.6      | 0.2  |
|                       |         |           |      | F···C         | 4.6     | 4.3       | -0.3 |

**Table S5.** Integral characteristics of the Hirshfeld surface analysis for Pt(acac)<sub>2</sub> and FIB moieties of [Pt(acac)<sub>2</sub>]<sub>2</sub>•2(1,3,5-FIB) at 100 and 300 K.

| Moiety      | Pt(acac) <sub>2</sub> |        |        | FIB    |       |        |
|-------------|-----------------------|--------|--------|--------|-------|--------|
|             | 100                   | 300    | Δ      | 100    | 300   | Δ      |
| Temperature | 100                   | 300    | Δ      | 100    | 300   | Δ      |
| Volume      | 280.91                | 291.7  | 10.79  | 240.36 | 247.8 | 7.44   |
| Area        | 287.05                | 292.28 | 5.23   | 230.66 | 234.4 | 3.74   |
| Globularity | 0.723                 | 0.728  | 0.005  | 0.81   | 0.814 | 0.004  |
| Asphericity | 0.165                 | 0.161  | -0.004 | 0.105  | 0.102 | -0.003 |

## ***XRD study of the [Pd(acac)<sub>2</sub>](1,3,5-FIB) complex***

**Table S6.** Main crystallography data and refinement details for [Pd(acac)<sub>2</sub>](1,3,5-FIB) crystal.

|                                                                                       |                                                                                 |
|---------------------------------------------------------------------------------------|---------------------------------------------------------------------------------|
| Formula                                                                               | C <sub>16</sub> H <sub>14</sub> F <sub>4</sub> I <sub>2</sub> O <sub>4</sub> Pd |
| Mass                                                                                  | 814.37                                                                          |
| T, K                                                                                  | 100                                                                             |
| Crystal system                                                                        | Monoclinic                                                                      |
| Space group                                                                           | P2 <sub>1</sub> /n                                                              |
| Z                                                                                     | 4                                                                               |
| a, Å                                                                                  | 4.34010(10)                                                                     |
| b, Å                                                                                  | 16.4262(5)                                                                      |
| c, Å                                                                                  | 30.1450(11)                                                                     |
| α, °                                                                                  | 90                                                                              |
| β, °                                                                                  | 93.037(3)                                                                       |
| γ, °                                                                                  | 90                                                                              |
| V, Å <sup>3</sup>                                                                     | 2146.06(11)                                                                     |
| d <sub>calc</sub> , g·cm <sup>-3</sup>                                                | 2.521                                                                           |
| F(000)                                                                                | 1496                                                                            |
| 2θ <sub>max</sub> , °                                                                 | 59                                                                              |
| Reflections measured                                                                  | 25130                                                                           |
| Number of independent reflections                                                     | 5407                                                                            |
| Reflections with I>2σ(I)                                                              | 4988                                                                            |
| Number of parameters                                                                  | 251                                                                             |
| R <sub>1</sub>                                                                        | 0.0344                                                                          |
| wR <sub>2</sub>                                                                       | 0.0633                                                                          |
| GOF                                                                                   | 1.176                                                                           |
| Residual electron density,<br>e·Å <sup>-3</sup> (d <sub>min</sub> /d <sub>max</sub> ) | 1.102/-0.812                                                                    |



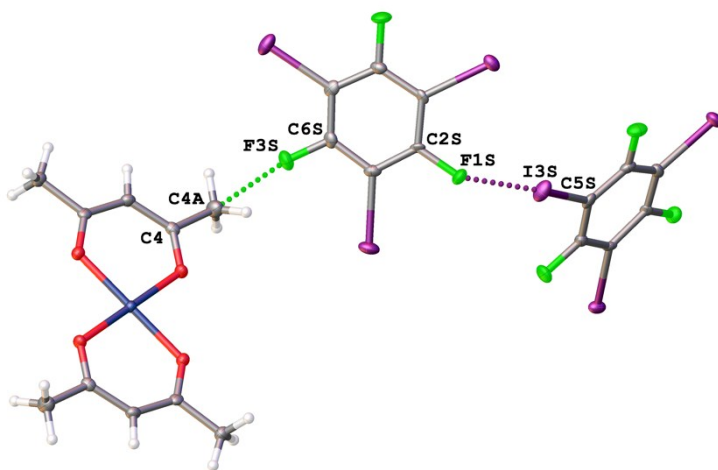

**Fig. S2.** Short contacts (dotted lines) in the structure of [Pd(acac)<sub>2</sub>] $\cdot$ 1,3,5-FIB; environment of the 1,3,5-FIB molecule.

## *Theoretical Study on Noncovalent Interactions*

**Table S7.** Cartesian atomic coordinates of model supramolecular associates.

| Atom            | X         | Y         | Z         |
|-----------------|-----------|-----------|-----------|
| <b>I-Pt 100</b> |           |           |           |
| Pt              | 0.000000  | 8.920700  | 0.000000  |
| O               | 0.900487  | 9.587255  | 1.642831  |
| O               | -0.536680 | 7.169567  | 0.761683  |
| C               | 0.975209  | 8.883233  | 2.722364  |
| C               | 1.720175  | 9.543365  | 3.848236  |
| H               | 1.696794  | 10.515721 | 3.730218  |
| H               | 2.651107  | 9.236493  | 3.848236  |
| H               | 1.299841  | 9.307858  | 4.701147  |
| C               | 0.445357  | 7.603113  | 2.899752  |
| H               | 0.565611  | 7.216846  | 3.759904  |
| C               | -0.235350 | 6.826655  | 1.971542  |
| C               | -0.710268 | 5.450548  | 2.344419  |
| H               | -1.583948 | 5.284623  | 1.933168  |
| H               | -0.791470 | 5.386319  | 3.318968  |
| H               | -0.066485 | 4.785063  | 2.025845  |
| O               | -0.900487 | 8.254145  | -1.642831 |
| O               | 0.536680  | 10.671833 | -0.761683 |
| C               | -0.975209 | 8.958167  | -2.722364 |
| C               | -1.720175 | 8.298035  | -3.848236 |
| H               | -1.696794 | 7.325679  | -3.730218 |
| H               | -2.651107 | 8.604907  | -3.848236 |
| H               | -1.299841 | 8.533542  | -4.701147 |
| C               | -0.445357 | 10.238287 | -2.899752 |
| H               | -0.565611 | 10.624554 | -3.759904 |
| C               | 0.235350  | 11.014745 | -1.971542 |
| C               | 0.710268  | 12.390852 | -2.344419 |
| H               | 1.583948  | 12.556777 | -1.933168 |
| H               | 0.791470  | 12.455081 | -3.318968 |
| H               | 0.066485  | 13.056337 | -2.025845 |
| I               | -3.484176 | 6.759928  | -0.828583 |
| I               | -9.545964 | 6.736377  | -0.455996 |
| I               | -6.479079 | 1.538286  | -0.829742 |
| F               | -4.157173 | 3.684606  | -0.894905 |
| F               | -6.529265 | 7.731749  | -0.742858 |
| F               | -8.844599 | 3.642857  | -0.540129 |
| C               | -5.316613 | 4.349376  | -0.804401 |
| C               | -5.299361 | 5.734583  | -0.784852 |
| C               | -6.518935 | 6.381690  | -0.720413 |
| C               | -7.724987 | 5.711746  | -0.642941 |

|                 |           |           |           |
|-----------------|-----------|-----------|-----------|
| C               | -7.688032 | 4.328324  | -0.639321 |
| C               | -6.496807 | 3.618771  | -0.736342 |
| I               | 3.484176  | 11.081472 | 0.828583  |
| I               | 9.545964  | 11.105023 | 0.455996  |
| I               | 6.479079  | 16.303114 | 0.829742  |
| F               | 4.157173  | 14.156794 | 0.894905  |
| F               | 6.529265  | 10.109651 | 0.742858  |
| F               | 8.844599  | 14.198543 | 0.540129  |
| C               | 5.316613  | 13.492024 | 0.804401  |
| C               | 5.299361  | 12.106817 | 0.784852  |
| C               | 6.518935  | 11.459710 | 0.720413  |
| C               | 7.724987  | 12.129654 | 0.642941  |
| C               | 7.688032  | 13.513076 | 0.639321  |
| C               | 6.496807  | 14.222629 | 0.736342  |
| I               | 8.637324  | 6.759928  | -0.828583 |
| I               | 2.575536  | 6.736377  | -0.455996 |
| I               | 5.642421  | 1.538286  | -0.829742 |
| F               | 7.964327  | 3.684606  | -0.894905 |
| F               | 5.592235  | 7.731749  | -0.742858 |
| F               | 3.276901  | 3.642857  | -0.540129 |
| C               | 6.804887  | 4.349376  | -0.804401 |
| C               | 6.822139  | 5.734583  | -0.784852 |
| C               | 5.602565  | 6.381690  | -0.720413 |
| C               | 4.396513  | 5.711746  | -0.642941 |
| C               | 4.433468  | 4.328324  | -0.639321 |
| C               | 5.624693  | 3.618771  | -0.736342 |
| I               | -8.637324 | 11.081472 | 0.828583  |
| I               | -2.575536 | 11.105023 | 0.455996  |
| I               | -5.642421 | 16.303114 | 0.829742  |
| F               | -7.964327 | 14.156794 | 0.894905  |
| F               | -5.592235 | 10.109651 | 0.742858  |
| F               | -3.276901 | 14.198543 | 0.540129  |
| C               | -6.804887 | 13.492024 | 0.804401  |
| C               | -6.822139 | 12.106817 | 0.784852  |
| C               | -5.602565 | 11.459710 | 0.720413  |
| C               | -4.396513 | 12.129654 | 0.642941  |
| C               | -4.433468 | 13.513076 | 0.639321  |
| C               | -5.624693 | 14.222629 | 0.736342  |
| <b>I-Pt 150</b> |           |           |           |
| Pt              | 0.000000  | 8.933000  | 0.000000  |
| O               | 0.904655  | 9.594935  | 1.644950  |
| O               | -0.541174 | 7.183740  | 0.757418  |
| C               | 0.976408  | 8.888871  | 2.715658  |
| C               | 1.725089  | 9.535084  | 3.839428  |
| H               | 1.776385  | 10.501635 | 3.683874  |
| H               | 2.630534  | 9.163471  | 3.885222  |
| H               | 1.259020  | 9.365357  | 4.684073  |

|   |           |           |           |
|---|-----------|-----------|-----------|
| C | 0.444108  | 7.605556  | 2.892292  |
| H | 0.567666  | 7.212504  | 3.747840  |
| C | -0.243855 | 6.842678  | 1.957512  |
| C | -0.717788 | 5.459850  | 2.329679  |
| H | -1.572177 | 5.275830  | 1.884823  |
| H | -0.837783 | 5.406252  | 3.300803  |
| H | -0.053853 | 4.798808  | 2.045466  |
| O | -0.904655 | 8.271065  | -1.644950 |
| O | 0.541174  | 10.682260 | -0.757418 |
| C | -0.976408 | 8.977129  | -2.715658 |
| C | -1.725089 | 8.330916  | -3.839428 |
| H | -1.776385 | 7.364365  | -3.683874 |
| H | -2.630534 | 8.702529  | -3.885222 |
| H | -1.259020 | 8.500643  | -4.684073 |
| C | -0.444108 | 10.260444 | -2.892292 |
| H | -0.567666 | 10.653496 | -3.747840 |
| C | 0.243855  | 11.023322 | -1.957512 |
| C | 0.717788  | 12.406150 | -2.329679 |
| H | 1.572177  | 12.590170 | -1.884823 |
| H | 0.837783  | 12.459748 | -3.300803 |
| H | 0.053853  | 13.067192 | -2.045466 |
| I | -3.499636 | 6.768891  | -0.804230 |
| I | -9.559068 | 6.744594  | -0.468044 |
| I | -6.491540 | 1.549340  | -0.824220 |
| F | -4.171394 | 3.692545  | -0.875174 |
| F | -6.543632 | 7.739373  | -0.731250 |
| F | -8.853197 | 3.650560  | -0.549528 |
| C | -5.331516 | 4.361805  | -0.794490 |
| C | -5.309716 | 5.743383  | -0.766141 |
| C | -6.528688 | 6.391919  | -0.713078 |
| C | -7.740894 | 5.722480  | -0.636028 |
| C | -7.703698 | 4.336614  | -0.640389 |
| C | -6.509113 | 3.624118  | -0.734885 |
| I | 3.499636  | 11.097109 | 0.804230  |
| I | 9.559068  | 11.121406 | 0.468044  |
| I | 6.491540  | 16.316660 | 0.824220  |
| F | 4.171394  | 14.173455 | 0.875174  |
| F | 6.543632  | 10.126627 | 0.731250  |
| F | 8.853197  | 14.215440 | 0.549528  |
| C | 5.331516  | 13.504195 | 0.794490  |
| C | 5.309716  | 12.122617 | 0.766141  |
| C | 6.528688  | 11.474081 | 0.713078  |
| C | 7.740894  | 12.143520 | 0.636028  |
| C | 7.703698  | 13.529386 | 0.640389  |
| C | 6.509113  | 14.241882 | 0.734885  |
| I | 8.646564  | 6.768891  | -0.804230 |
| I | 2.587132  | 6.744594  | -0.468044 |

|                 |           |           |           |
|-----------------|-----------|-----------|-----------|
| I               | 5.654660  | 1.549340  | -0.824220 |
| F               | 7.974806  | 3.692545  | -0.875174 |
| F               | 5.602568  | 7.739373  | -0.731250 |
| F               | 3.293003  | 3.650560  | -0.549528 |
| C               | 6.814684  | 4.361805  | -0.794490 |
| C               | 6.836484  | 5.743383  | -0.766141 |
| C               | 5.617512  | 6.391919  | -0.713078 |
| C               | 4.405306  | 5.722480  | -0.636028 |
| C               | 4.442502  | 4.336614  | -0.640389 |
| C               | 5.637087  | 3.624118  | -0.734885 |
| I               | -8.646564 | 11.097109 | 0.804230  |
| I               | -2.587132 | 11.121406 | 0.468044  |
| I               | -5.654660 | 16.316660 | 0.824220  |
| F               | -7.974806 | 14.173455 | 0.875174  |
| F               | -5.602568 | 10.126627 | 0.731250  |
| F               | -3.293003 | 14.215440 | 0.549528  |
| C               | -6.814684 | 13.504195 | 0.794490  |
| C               | -6.836484 | 12.122617 | 0.766141  |
| C               | -5.617512 | 11.474081 | 0.713078  |
| C               | -4.405306 | 12.143520 | 0.636028  |
| C               | -4.442502 | 13.529386 | 0.640389  |
| C               | -5.637087 | 14.241882 | 0.734885  |
| <b>I-Pt 200</b> |           |           |           |
| Pt              | 0.000000  | 8.943300  | 0.000000  |
| O               | 0.906284  | 9.599023  | 1.647092  |
| O               | -0.540453 | 7.192381  | 0.752727  |
| C               | 0.980799  | 8.886063  | 2.711568  |
| C               | 1.724785  | 9.542501  | 3.831532  |
| H               | 1.786020  | 10.506589 | 3.662150  |
| H               | 2.627182  | 9.165094  | 3.891400  |
| H               | 1.250066  | 9.388676  | 4.674790  |
| C               | 0.446676  | 7.603594  | 2.884600  |
| H               | 0.572656  | 7.206511  | 3.738080  |
| C               | -0.245270 | 6.846990  | 1.954461  |
| C               | -0.728699 | 5.464356  | 2.318048  |
| H               | -1.607283 | 5.306954  | 1.912846  |
| H               | -0.801593 | 5.389233  | 3.292723  |
| H               | -0.092399 | 4.797186  | 1.985125  |
| O               | -0.906284 | 8.287577  | -1.647092 |
| O               | 0.540453  | 10.694219 | -0.752727 |
| C               | -0.980799 | 9.000537  | -2.711568 |
| C               | -1.724785 | 8.344099  | -3.831532 |
| H               | -1.786020 | 7.380011  | -3.662150 |
| H               | -2.627182 | 8.721506  | -3.891400 |
| H               | -1.250066 | 8.497924  | -4.674790 |
| C               | -0.446676 | 10.283006 | -2.884600 |
| H               | -0.572656 | 10.680089 | -3.738080 |

|   |           |           |           |
|---|-----------|-----------|-----------|
| C | 0.245270  | 11.039610 | -1.954461 |
| C | 0.728699  | 12.422244 | -2.318048 |
| H | 1.607283  | 12.579646 | -1.912846 |
| H | 0.801593  | 12.497367 | -3.292723 |
| H | 0.092399  | 13.089414 | -1.985125 |
| I | 3.515257  | 11.109546 | 0.785727  |
| I | 9.571010  | 11.134587 | 0.481278  |
| I | 6.502826  | 16.326888 | 0.822086  |
| F | 4.183222  | 14.183001 | 0.865161  |
| F | 6.559300  | 10.142418 | 0.730824  |
| F | 8.863121  | 14.228611 | 0.560712  |
| C | 5.340221  | 13.516904 | 0.790692  |
| C | 5.321490  | 12.134269 | 0.758567  |
| C | 6.541217  | 11.492141 | 0.708921  |
| C | 7.750234  | 12.157522 | 0.643943  |
| C | 7.714554  | 13.538368 | 0.646133  |
| C | 6.530216  | 14.253832 | 0.730094  |
| I | -3.515257 | 6.777054  | -0.785727 |
| I | -9.571010 | 6.752013  | -0.481278 |
| I | -6.502826 | 1.559712  | -0.822086 |
| F | -4.183222 | 3.703599  | -0.865161 |
| F | -6.559300 | 7.744182  | -0.730824 |
| F | -8.863121 | 3.657989  | -0.560712 |
| C | -5.340221 | 4.369696  | -0.790692 |
| C | -5.321490 | 5.752331  | -0.758567 |
| C | -6.541217 | 6.394460  | -0.708921 |
| C | -7.750234 | 5.729078  | -0.643943 |
| C | -7.714554 | 4.348232  | -0.646133 |
| C | -6.530216 | 3.632768  | -0.730094 |
| I | 8.656143  | 6.777054  | -0.785727 |
| I | 2.600390  | 6.752013  | -0.481278 |
| I | 5.668574  | 1.559712  | -0.822086 |
| F | 7.988178  | 3.703599  | -0.865161 |
| F | 5.612100  | 7.744182  | -0.730824 |
| F | 3.308279  | 3.657989  | -0.560712 |
| C | 6.831179  | 4.369696  | -0.790692 |
| C | 6.849910  | 5.752331  | -0.758567 |
| C | 5.630183  | 6.394460  | -0.708921 |
| C | 4.421166  | 5.729078  | -0.643943 |
| C | 4.456846  | 4.348232  | -0.646133 |
| C | 5.641184  | 3.632768  | -0.730094 |
| I | -8.656143 | 11.109546 | 0.785727  |
| I | -2.600390 | 11.134587 | 0.481278  |
| I | -5.668574 | 16.326888 | 0.822086  |
| F | -7.988178 | 14.183001 | 0.865161  |
| F | -5.612100 | 10.142418 | 0.730824  |
| F | -3.308279 | 14.228611 | 0.560712  |

|                 |           |           |           |
|-----------------|-----------|-----------|-----------|
| C               | -6.831179 | 13.516904 | 0.790692  |
| C               | -6.849910 | 12.134269 | 0.758567  |
| C               | -5.630183 | 11.492141 | 0.708921  |
| C               | -4.421166 | 12.157522 | 0.643943  |
| C               | -4.456846 | 13.538368 | 0.646133  |
| C               | -5.641184 | 14.253832 | 0.730094  |
| <b>I-Pt 250</b> |           |           |           |
| Pt              | 0.000000  | 8.953750  | 0.000000  |
| O               | 0.906140  | 9.607016  | 1.652736  |
| O               | -0.543617 | 7.202217  | 0.749309  |
| C               | 0.984558  | 8.887492  | 2.709548  |
| C               | 1.727689  | 9.535744  | 3.830209  |
| H               | 1.763545  | 10.504540 | 3.681227  |
| H               | 2.639559  | 9.177594  | 3.869105  |
| H               | 1.268366  | 9.353087  | 4.676392  |
| C               | 0.454074  | 7.610687  | 2.875409  |
| H               | 0.591923  | 7.207769  | 3.725261  |
| C               | -0.246582 | 6.860363  | 1.958037  |
| C               | -0.725150 | 5.468951  | 2.308106  |
| H               | -1.578453 | 5.293457  | 1.858227  |
| H               | -0.848729 | 5.400902  | 3.278318  |
| H               | -0.060313 | 4.811745  | 2.016015  |
| O               | -0.906140 | 8.300484  | -1.652736 |
| O               | 0.543617  | 10.705283 | -0.749309 |
| C               | -0.984558 | 9.020008  | -2.709548 |
| C               | -1.727689 | 8.371756  | -3.830209 |
| H               | -1.763545 | 7.402960  | -3.681227 |
| H               | -2.639559 | 8.729906  | -3.869105 |
| H               | -1.268366 | 8.554413  | -4.676392 |
| C               | -0.454074 | 10.296812 | -2.875409 |
| H               | -0.591923 | 10.699731 | -3.725261 |
| C               | 0.246582  | 11.047137 | -1.958037 |
| C               | 0.725150  | 12.438549 | -2.308106 |
| H               | 1.578453  | 12.614043 | -1.858227 |
| H               | 0.848729  | 12.506598 | -3.278318 |
| H               | 0.060313  | 13.095755 | -2.016015 |
| I               | 3.531626  | 11.120737 | 0.772427  |
| I               | 9.584736  | 11.148851 | 0.495601  |
| I               | 6.514000  | 16.337908 | 0.823212  |
| F               | 4.196632  | 14.194022 | 0.851321  |
| F               | 6.572371  | 10.158746 | 0.730961  |
| F               | 8.876714  | 14.242551 | 0.572440  |
| C               | 5.353746  | 13.529116 | 0.778665  |
| C               | 5.340908  | 12.146657 | 0.754446  |
| C               | 6.554845  | 11.503420 | 0.712614  |
| C               | 7.761721  | 12.175309 | 0.655370  |
| C               | 7.721588  | 13.550605 | 0.654636  |

|                 |           |           |           |
|-----------------|-----------|-----------|-----------|
| C               | 6.541228  | 14.263324 | 0.734631  |
| I               | -3.531626 | 6.786763  | -0.772427 |
| I               | -9.584736 | 6.758649  | -0.495601 |
| I               | -6.514000 | 1.569592  | -0.823212 |
| F               | -4.196632 | 3.713478  | -0.851321 |
| F               | -6.572371 | 7.748754  | -0.730961 |
| F               | -8.876714 | 3.664949  | -0.572440 |
| C               | -5.353746 | 4.378384  | -0.778665 |
| C               | -5.340908 | 5.760843  | -0.754446 |
| C               | -6.554845 | 6.404080  | -0.712614 |
| C               | -7.761721 | 5.732191  | -0.655370 |
| C               | -7.721588 | 4.356895  | -0.654636 |
| C               | -6.541228 | 3.644176  | -0.734631 |
| I               | 8.668674  | 6.786763  | -0.772427 |
| I               | 2.615564  | 6.758649  | -0.495601 |
| I               | 5.686300  | 1.569592  | -0.823212 |
| F               | 8.003668  | 3.713478  | -0.851321 |
| F               | 5.627929  | 7.748754  | -0.730961 |
| F               | 3.323586  | 3.664949  | -0.572440 |
| C               | 6.846554  | 4.378384  | -0.778665 |
| C               | 6.859392  | 5.760843  | -0.754446 |
| C               | 5.645455  | 6.404080  | -0.712614 |
| C               | 4.438579  | 5.732191  | -0.655370 |
| C               | 4.478712  | 4.356895  | -0.654636 |
| C               | 5.659072  | 3.644176  | -0.734631 |
| I               | -8.668674 | 11.120737 | 0.772427  |
| I               | -2.615564 | 11.148851 | 0.495601  |
| I               | -5.686300 | 16.337908 | 0.823212  |
| F               | -8.003668 | 14.194022 | 0.851321  |
| F               | -5.627929 | 10.158746 | 0.730961  |
| F               | -3.323586 | 14.242551 | 0.572440  |
| C               | -6.846554 | 13.529116 | 0.778665  |
| C               | -6.859392 | 12.146657 | 0.754446  |
| C               | -5.645455 | 11.503420 | 0.712614  |
| C               | -4.438579 | 12.175309 | 0.655370  |
| C               | -4.478712 | 13.550605 | 0.654636  |
| C               | -5.659072 | 14.263324 | 0.734631  |
| <b>I-Pt 300</b> |           |           |           |
| Pt              | 0.000000  | 8.962650  | 0.000000  |
| O               | 0.905830  | 9.608678  | 1.655137  |
| O               | -0.546900 | 7.213320  | 0.748243  |
| C               | 0.978067  | 8.890949  | 2.708138  |
| C               | 1.731169  | 9.543430  | 3.825337  |
| H               | 1.759222  | 10.511396 | 3.679230  |
| H               | 2.644593  | 9.190301  | 3.853377  |
| H               | 1.281238  | 9.353422  | 4.676149  |
| C               | 0.452574  | 7.603912  | 2.866789  |



|   |           |           |           |
|---|-----------|-----------|-----------|
| H | 0.598096  | 7.193423  | 3.710960  |
| C | -0.245347 | 6.867182  | 1.951040  |
| C | -0.729287 | 5.469009  | 2.291217  |
| H | -1.540879 | 5.270038  | 1.779844  |
| H | -0.926635 | 5.415233  | 3.249765  |
| H | -0.032799 | 4.818321  | 2.063940  |
| O | -0.905830 | 8.316622  | -1.655137 |
| O | 0.546900  | 10.711980 | -0.748243 |
| C | -0.978067 | 9.034351  | -2.708138 |
| C | -1.731169 | 8.381870  | -3.825337 |
| H | -1.759222 | 7.413904  | -3.679230 |
| H | -2.644593 | 8.734999  | -3.853377 |
| H | -1.281238 | 8.571878  | -4.676149 |
| C | -0.452574 | 10.321388 | -2.866789 |
| H | -0.598096 | 10.731877 | -3.710960 |
| C | 0.245347  | 11.058118 | -1.951040 |
| C | 0.729287  | 12.456291 | -2.291217 |
| H | 1.540879  | 12.655262 | -1.779844 |
| H | 0.926635  | 12.510067 | -3.249765 |
| H | 0.032799  | 13.106979 | -2.063940 |
| I | 3.547230  | 11.128743 | 0.764256  |
| I | 9.597335  | 11.160830 | 0.511226  |
| I | 6.522949  | 16.346260 | 0.827126  |
| F | 4.207472  | 14.200423 | 0.845647  |
| F | 6.587949  | 10.170815 | 0.729057  |
| F | 8.888190  | 14.254199 | 0.588854  |
| C | 5.374547  | 13.530016 | 0.779973  |
| C | 5.354041  | 12.158731 | 0.750457  |
| C | 6.570841  | 11.518798 | 0.715037  |
| C | 7.768863  | 12.180241 | 0.661169  |
| C | 7.736235  | 13.562282 | 0.658956  |
| C | 6.550547  | 14.279294 | 0.740126  |
| I | -3.547230 | 6.796557  | -0.764256 |
| I | -9.597335 | 6.764470  | -0.511226 |
| I | -6.522949 | 1.579040  | -0.827126 |
| F | -4.207472 | 3.724877  | -0.845647 |
| F | -6.587949 | 7.754485  | -0.729057 |
| F | -8.888190 | 3.671101  | -0.588854 |
| C | -5.374547 | 4.395284  | -0.779973 |
| C | -5.354041 | 5.766569  | -0.750457 |
| C | -6.570841 | 6.406502  | -0.715037 |
| C | -7.768863 | 5.745059  | -0.661169 |
| C | -7.736235 | 4.363018  | -0.658956 |
| C | -6.550547 | 3.646006  | -0.740126 |
| I | 8.680970  | 6.796557  | -0.764256 |
| I | 2.630865  | 6.764470  | -0.511226 |
| I | 5.705251  | 1.579040  | -0.827126 |

|                              |           |           |           |
|------------------------------|-----------|-----------|-----------|
| F                            | 8.020728  | 3.724877  | -0.845647 |
| F                            | 5.640251  | 7.754485  | -0.729057 |
| F                            | 3.340010  | 3.671101  | -0.588854 |
| C                            | 6.853653  | 4.395284  | -0.779973 |
| C                            | 6.874159  | 5.766569  | -0.750457 |
| C                            | 5.657359  | 6.406502  | -0.715037 |
| C                            | 4.459337  | 5.745059  | -0.661169 |
| C                            | 4.491965  | 4.363018  | -0.658956 |
| C                            | 5.677653  | 3.646006  | -0.740126 |
| I                            | -8.680970 | 11.128743 | 0.764256  |
| I                            | -2.630865 | 11.160830 | 0.511226  |
| I                            | -5.705251 | 16.346260 | 0.827126  |
| F                            | -8.020728 | 14.200423 | 0.845647  |
| F                            | -5.640251 | 10.170815 | 0.729057  |
| F                            | -3.340010 | 14.254199 | 0.588854  |
| C                            | -6.853653 | 13.530016 | 0.779973  |
| C                            | -6.874159 | 12.158731 | 0.750457  |
| C                            | -5.657359 | 11.518798 | 0.715037  |
| C                            | -4.459337 | 12.180241 | 0.661169  |
| C                            | -4.491965 | 13.562282 | 0.658956  |
| C                            | -5.677653 | 14.279294 | 0.740126  |
| <b>Pdacac23plus2_135-FIB</b> |           |           |           |
| I                            | -0.123092 | 9.835352  | 24.986113 |
| I                            | 1.237571  | 9.916168  | 19.097129 |
| I                            | 3.070715  | 14.419083 | 22.692892 |
| F                            | -0.012493 | 9.104714  | 21.896978 |
| F                            | 1.558902  | 12.507894 | 24.722112 |
| F                            | 2.686777  | 12.545346 | 20.167881 |
| C                            | 0.780972  | 10.765731 | 23.343109 |
| C                            | 2.126253  | 12.582469 | 22.437922 |
| C                            | 1.337282  | 10.798584 | 20.972525 |
| C                            | 2.044860  | 11.969772 | 21.198897 |
| C                            | 0.701930  | 10.238450 | 22.067961 |
| C                            | 1.486725  | 11.946775 | 23.497536 |
| Pd                           | 1.371496  | 8.213100  | 15.051331 |
| O                            | 0.580665  | 7.817721  | 16.827689 |
| O                            | 0.582777  | 6.644398  | 14.129287 |
| C                            | -0.210340 | 6.823443  | 17.020346 |
| C                            | -0.205874 | 5.824731  | 14.719299 |
| C                            | -0.605459 | 5.888793  | 16.058265 |
| H                            | -1.202834 | 5.235030  | 16.339725 |
| C                            | -0.737955 | 4.699536  | 13.876424 |
| H                            | -1.697599 | 4.725818  | 13.877327 |
| H                            | -0.440340 | 3.861800  | 14.238559 |
| H                            | -0.415521 | 4.793165  | 12.977258 |
| C                            | -0.706863 | 6.660824  | 18.427646 |
| H                            | 0.031474  | 6.455497  | 19.006821 |

|    |           |           |           |
|----|-----------|-----------|-----------|
| H  | -1.347112 | 5.946284  | 18.461963 |
| H  | -1.122850 | 7.477206  | 18.717835 |
| O  | 2.162328  | 8.608479  | 13.274973 |
| O  | 2.160216  | 9.781802  | 15.973376 |
| C  | 2.953333  | 9.602757  | 13.082316 |
| C  | 2.948867  | 10.601469 | 15.383363 |
| C  | 3.348452  | 10.537407 | 14.044397 |
| H  | 3.945826  | 11.191170 | 13.762937 |
| C  | 3.480947  | 11.726664 | 16.226238 |
| H  | 4.440591  | 11.700382 | 16.225335 |
| H  | 3.183333  | 12.564400 | 15.864103 |
| H  | 3.158513  | 11.633035 | 17.125405 |
| C  | 3.449856  | 9.765376  | 11.675017 |
| H  | 2.711518  | 9.970703  | 11.095841 |
| H  | 4.090105  | 10.479916 | 11.640699 |
| H  | 3.865843  | 8.948994  | 11.384827 |
| I  | 2.866085  | 6.590848  | 5.116550  |
| I  | 1.505422  | 6.510032  | 11.005533 |
| I  | -0.327723 | 2.007117  | 7.409770  |
| F  | 2.755486  | 7.321486  | 8.205685  |
| F  | 1.184091  | 3.918306  | 5.380550  |
| F  | 0.056216  | 3.880854  | 9.934782  |
| C  | 1.962021  | 5.660469  | 6.759553  |
| C  | 0.616740  | 3.843731  | 7.664740  |
| C  | 1.405711  | 5.627616  | 9.130137  |
| C  | 0.698133  | 4.456428  | 8.903765  |
| C  | 2.041063  | 6.187750  | 8.034702  |
| C  | 1.256268  | 4.479425  | 6.605126  |
| Pd | -2.968604 | 8.213100  | 15.051331 |
| O  | -2.177772 | 8.608479  | 13.274973 |
| O  | -2.179884 | 9.781802  | 15.973376 |
| C  | -1.386767 | 9.602757  | 13.082316 |
| C  | -1.391233 | 10.601469 | 15.383363 |
| C  | -0.991648 | 10.537407 | 14.044397 |
| H  | -0.394274 | 11.191170 | 13.762937 |
| C  | -0.859153 | 11.726664 | 16.226238 |
| H  | 0.100491  | 11.700382 | 16.225335 |
| H  | -1.156767 | 12.564400 | 15.864103 |
| H  | -1.181587 | 11.633035 | 17.125405 |
| C  | -0.890244 | 9.765376  | 11.675017 |
| H  | -1.628582 | 9.970703  | 11.095841 |
| H  | -0.249995 | 10.479916 | 11.640699 |
| H  | -0.474257 | 8.948994  | 11.384827 |
| O  | -3.759435 | 7.817721  | 16.827689 |
| O  | -3.757323 | 6.644398  | 14.129287 |
| C  | -4.550440 | 6.823443  | 17.020346 |
| C  | -4.545974 | 5.824731  | 14.719299 |

|                              |           |           |           |
|------------------------------|-----------|-----------|-----------|
| C                            | -4.945559 | 5.888793  | 16.058265 |
| H                            | -5.542934 | 5.235030  | 16.339725 |
| C                            | -5.078055 | 4.699536  | 13.876424 |
| H                            | -6.037699 | 4.725818  | 13.877327 |
| H                            | -4.780440 | 3.861800  | 14.238559 |
| H                            | -4.755621 | 4.793165  | 12.977258 |
| C                            | -5.046963 | 6.660824  | 18.427646 |
| H                            | -4.308626 | 6.455497  | 19.006821 |
| H                            | -5.687212 | 5.946284  | 18.461963 |
| H                            | -5.462950 | 7.477206  | 18.717835 |
| Pd                           | 5.711596  | 8.213100  | 15.051331 |
| O                            | 4.920765  | 7.817721  | 16.827689 |
| O                            | 4.922877  | 6.644398  | 14.129287 |
| C                            | 4.129760  | 6.823443  | 17.020346 |
| C                            | 4.134226  | 5.824731  | 14.719299 |
| C                            | 3.734641  | 5.888793  | 16.058265 |
| H                            | 3.137266  | 5.235030  | 16.339725 |
| C                            | 3.602145  | 4.699536  | 13.876424 |
| H                            | 2.642501  | 4.725818  | 13.877327 |
| H                            | 3.899760  | 3.861800  | 14.238559 |
| H                            | 3.924579  | 4.793165  | 12.977258 |
| C                            | 3.633237  | 6.660824  | 18.427646 |
| H                            | 4.371574  | 6.455497  | 19.006821 |
| H                            | 2.992988  | 5.946284  | 18.461963 |
| H                            | 3.217250  | 7.477206  | 18.717835 |
| O                            | 6.502428  | 8.608479  | 13.274973 |
| O                            | 6.500316  | 9.781802  | 15.973376 |
| C                            | 7.293433  | 9.602757  | 13.082316 |
| C                            | 7.288967  | 10.601469 | 15.383363 |
| C                            | 7.688552  | 10.537407 | 14.044397 |
| H                            | 8.285926  | 11.191170 | 13.762937 |
| C                            | 7.821047  | 11.726664 | 16.226238 |
| H                            | 8.780691  | 11.700382 | 16.225335 |
| H                            | 7.523433  | 12.564400 | 15.864103 |
| H                            | 7.498613  | 11.633035 | 17.125405 |
| C                            | 7.789956  | 9.765376  | 11.675017 |
| H                            | 7.051618  | 9.970703  | 11.095841 |
| H                            | 8.430205  | 10.479916 | 11.640699 |
| H                            | 8.205943  | 8.948994  | 11.384827 |
| <b>Pdacac23plus4_135-FIB</b> |           |           |           |
| I                            | -0.123092 | 9.835352  | 24.986113 |
| I                            | 1.237571  | 9.916168  | 19.097129 |
| I                            | 3.070715  | 14.419083 | 22.692892 |
| F                            | -0.012493 | 9.104714  | 21.896978 |
| F                            | 1.558902  | 12.507894 | 24.722112 |
| F                            | 2.686777  | 12.545346 | 20.167881 |
| C                            | 0.780972  | 10.765731 | 23.343109 |

|    |           |           |           |
|----|-----------|-----------|-----------|
| C  | 2.126253  | 12.582469 | 22.437922 |
| C  | 1.337282  | 10.798584 | 20.972525 |
| C  | 2.044860  | 11.969772 | 21.198897 |
| C  | 0.701930  | 10.238450 | 22.067961 |
| C  | 1.486725  | 11.946775 | 23.497536 |
| Pd | -0.798554 | 16.426200 | 15.051331 |
| O  | 0.193872  | 18.024798 | 15.675961 |
| O  | -0.084676 | 15.207212 | 16.443278 |
| C  | 0.772569  | 15.580251 | 17.317159 |
| C  | 1.295793  | 16.874635 | 17.459845 |
| H  | 1.893713  | 17.009330 | 18.157926 |
| C  | 1.008138  | 17.980119 | 16.656405 |
| C  | 1.225983  | 14.502692 | 18.260275 |
| H  | 0.463585  | 14.011549 | 18.576353 |
| H  | 1.680712  | 14.901849 | 19.006821 |
| H  | 1.823153  | 13.906421 | 17.802714 |
| C  | 1.708142  | 19.294215 | 16.919201 |
| H  | 2.328629  | 19.473260 | 16.210284 |
| H  | 2.181162  | 19.243293 | 17.754550 |
| H  | 1.058283  | 19.998899 | 16.962850 |
| O  | -1.790979 | 14.827602 | 14.426701 |
| O  | -1.512432 | 17.645188 | 13.659384 |
| C  | -2.369676 | 17.272149 | 12.785504 |
| C  | -2.892900 | 15.977765 | 12.642817 |
| H  | -3.490820 | 15.843070 | 11.944736 |
| C  | -2.605245 | 14.872281 | 13.446257 |
| C  | -2.823091 | 18.349708 | 11.842387 |
| H  | -2.060692 | 18.840851 | 11.526309 |
| H  | -3.277820 | 17.950551 | 11.095841 |
| H  | -3.420260 | 18.945979 | 12.299948 |
| C  | -3.305249 | 13.558185 | 13.183461 |
| H  | -3.925736 | 13.379140 | 13.892379 |
| H  | -3.778269 | 13.609107 | 12.348112 |
| H  | -2.655390 | 12.853502 | 13.139812 |
| Pd | 3.541546  | 16.426200 | 15.051331 |
| O  | 4.533972  | 18.024798 | 15.675961 |
| O  | 4.255424  | 15.207212 | 16.443278 |
| C  | 5.112669  | 15.580251 | 17.317159 |
| C  | 5.635893  | 16.874635 | 17.459845 |
| H  | 6.233813  | 17.009330 | 18.157926 |
| C  | 5.348238  | 17.980119 | 16.656405 |
| C  | 5.566083  | 14.502692 | 18.260275 |
| H  | 4.803685  | 14.011549 | 18.576353 |
| H  | 6.020812  | 14.901849 | 19.006821 |
| H  | 6.163253  | 13.906421 | 17.802714 |
| C  | 6.048242  | 19.294215 | 16.919201 |
| H  | 6.668729  | 19.473260 | 16.210284 |

|   |          |           |           |
|---|----------|-----------|-----------|
| H | 6.521262 | 19.243293 | 17.754550 |
| H | 5.398383 | 19.998899 | 16.962850 |
| O | 2.549121 | 14.827602 | 14.426701 |
| O | 2.827668 | 17.645188 | 13.659384 |
| C | 1.970424 | 17.272149 | 12.785504 |
| C | 1.447200 | 15.977765 | 12.642817 |
| H | 0.849280 | 15.843070 | 11.944736 |
| C | 1.734855 | 14.872281 | 13.446257 |
| C | 1.517009 | 18.349708 | 11.842387 |
| H | 2.279408 | 18.840851 | 11.526309 |
| H | 1.062280 | 17.950551 | 11.095841 |
| H | 0.919840 | 18.945979 | 12.299948 |
| C | 1.034851 | 13.558185 | 13.183461 |
| H | 0.414364 | 13.379140 | 13.892379 |
| H | 0.561831 | 13.609107 | 12.348112 |
| H | 1.684710 | 12.853502 | 13.139812 |
| I | 4.237581 | 18.048452 | 20.167881 |
| I | 2.876918 | 18.129268 | 26.056864 |
| I | 1.043774 | 22.632183 | 22.461101 |
| F | 4.126982 | 17.317814 | 23.257016 |
| F | 2.555587 | 20.720994 | 20.431881 |
| F | 1.427713 | 20.758446 | 24.986113 |
| C | 3.333517 | 18.978831 | 21.810884 |
| C | 1.988237 | 20.795569 | 22.716071 |
| C | 2.777207 | 19.011684 | 24.181469 |
| C | 2.069629 | 20.182872 | 23.955097 |
| C | 3.412559 | 18.451550 | 23.086033 |
| C | 2.627764 | 20.159875 | 21.656457 |
| I | 2.845512 | 14.803948 | 9.934782  |
| I | 4.206175 | 14.723132 | 4.045798  |
| I | 6.039319 | 10.220217 | 7.641561  |
| F | 2.956110 | 15.534586 | 6.845646  |
| F | 4.527505 | 12.131406 | 9.670781  |
| F | 5.655380 | 12.093954 | 5.116550  |
| C | 3.749575 | 13.873569 | 8.291778  |
| C | 5.094856 | 12.056831 | 7.386591  |
| C | 4.305885 | 13.840716 | 5.921194  |
| C | 5.013464 | 12.669528 | 6.147566  |
| C | 3.670533 | 14.400850 | 7.016630  |
| C | 4.455329 | 12.692525 | 8.446205  |
| I | 7.206185 | 23.017048 | 5.116550  |
| I | 5.845522 | 22.936232 | 11.005533 |
| I | 4.012377 | 18.433317 | 7.409770  |
| F | 7.095586 | 23.747686 | 8.205685  |
| F | 5.524191 | 20.344506 | 5.380550  |
| F | 4.396316 | 20.307054 | 9.934782  |
| C | 6.302121 | 22.086669 | 6.759553  |

|    |           |           |           |
|----|-----------|-----------|-----------|
| C  | 4.956840  | 20.269931 | 7.664740  |
| C  | 5.745811  | 22.053816 | 9.130137  |
| C  | 5.038233  | 20.882628 | 8.903765  |
| C  | 6.381163  | 22.613950 | 8.034702  |
| C  | 5.596368  | 20.905625 | 6.605126  |
| Pd | 7.881646  | 16.426200 | 15.051331 |
| O  | 8.874072  | 18.024798 | 15.675961 |
| O  | 8.595524  | 15.207212 | 16.443278 |
| C  | 9.452769  | 15.580251 | 17.317159 |
| C  | 9.975993  | 16.874635 | 17.459845 |
| H  | 10.573913 | 17.009330 | 18.157926 |
| C  | 9.688338  | 17.980119 | 16.656405 |
| C  | 9.906183  | 14.502692 | 18.260275 |
| H  | 9.143785  | 14.011549 | 18.576353 |
| H  | 10.360912 | 14.901849 | 19.006821 |
| H  | 10.503353 | 13.906421 | 17.802714 |
| C  | 10.388342 | 19.294215 | 16.919201 |
| H  | 11.008829 | 19.473260 | 16.210284 |
| H  | 10.861362 | 19.243293 | 17.754550 |
| H  | 9.738483  | 19.998899 | 16.962850 |
| O  | 6.889221  | 14.827602 | 14.426701 |
| O  | 7.167768  | 17.645188 | 13.659384 |
| C  | 6.310524  | 17.272149 | 12.785504 |
| C  | 5.787300  | 15.977765 | 12.642817 |
| H  | 5.189380  | 15.843070 | 11.944736 |
| C  | 6.074955  | 14.872281 | 13.446257 |
| C  | 5.857109  | 18.349708 | 11.842387 |
| H  | 6.619508  | 18.840851 | 11.526309 |
| H  | 5.402380  | 17.950551 | 11.095841 |
| H  | 5.259940  | 18.945979 | 12.299948 |
| C  | 5.374951  | 13.558185 | 13.183461 |
| H  | 4.754464  | 13.379140 | 13.892379 |
| H  | 4.901931  | 13.609107 | 12.348112 |
| H  | 6.024810  | 12.853502 | 13.139812 |

We also carried out full geometry optimization procedure in the gas phase (M06/DZP-DKH level of theory) for two model supramolecular associates featuring the I $\cdots$ C XB and I $\cdots$  $\eta^2$ (O,O) bifurcated XB constructed based on the appropriate experimental X-ray geometry of [Pd(acac)<sub>2</sub>] $\cdot$ 1,3,5-FIB at 100 K as starting point. In both cases, we found corresponding minima on the potential energy surface (see **Table S8** for Cartesian atomic coordinates of their optimized equilibrium structures and **Table S9** for results of QTAIM analysis).

**Table S8.** Cartesian atomic coordinates for optimized equilibrium structures of two model supramolecular associates constructed based on the appropriate experimental X-ray geometry of [Pd(acac)<sub>2</sub>] $\cdot$ 1,3,5-FIB at 100 K as starting point.

| Atom                                                                                         | X         | Y         | Z         |
|----------------------------------------------------------------------------------------------|-----------|-----------|-----------|
| [Pd(acac) <sub>2</sub> ] $\cdot$ 1,3,5-FIB featuring I $\cdots$ C XB                         |           |           |           |
| Pd                                                                                           | -3.868445 | 0.040103  | 0.255216  |
| O                                                                                            | -3.934209 | -0.471660 | -1.604814 |
| O                                                                                            | -3.841291 | -1.773784 | 0.914188  |
| C                                                                                            | -3.681061 | -2.800703 | 0.182767  |
| C                                                                                            | -3.614401 | -2.800144 | -1.223179 |
| H                                                                                            | -3.477160 | -3.763137 | -1.725424 |
| C                                                                                            | -3.769167 | -1.657739 | -2.030287 |
| C                                                                                            | -3.499994 | -4.085588 | 0.928229  |
| H                                                                                            | -4.149302 | -4.100893 | 1.818354  |
| H                                                                                            | -2.453254 | -4.134142 | 1.283799  |
| H                                                                                            | -3.694302 | -4.967901 | 0.299057  |
| C                                                                                            | -3.684109 | -1.784744 | -3.518714 |
| H                                                                                            | -4.432754 | -1.131760 | -3.995967 |
| H                                                                                            | -3.810047 | -2.823026 | -3.862159 |
| H                                                                                            | -2.687446 | -1.425748 | -3.838280 |
| O                                                                                            | -3.757444 | 0.548600  | 2.110745  |
| O                                                                                            | -3.839575 | 1.850409  | -0.403734 |
| C                                                                                            | -3.734042 | 2.888681  | 0.326359  |
| C                                                                                            | -3.653317 | 2.897766  | 1.728666  |
| H                                                                                            | -3.565723 | 3.867934  | 2.227646  |
| C                                                                                            | -3.668992 | 1.747506  | 2.532765  |
| C                                                                                            | -3.694949 | 4.177295  | -0.435164 |
| H                                                                                            | -4.578178 | 4.240591  | -1.094012 |
| H                                                                                            | -3.663523 | 5.057535  | 0.224751  |
| H                                                                                            | -2.807459 | 4.184255  | -1.092624 |
| C                                                                                            | -3.576493 | 1.872134  | 4.022294  |
| H                                                                                            | -2.696630 | 1.310381  | 4.381947  |
| H                                                                                            | -3.502902 | 2.918470  | 4.355497  |
| H                                                                                            | -4.462261 | 1.402177  | 4.484520  |
| I                                                                                            | -0.574851 | -1.414251 | -0.650955 |
| I                                                                                            | 5.210283  | -2.029088 | 0.823018  |
| I                                                                                            | 3.074838  | 3.357410  | -0.688455 |
| F                                                                                            | 2.176891  | -2.670074 | 0.215779  |
| F                                                                                            | 0.516262  | 1.533936  | -0.960063 |
| F                                                                                            | 5.009855  | 1.046104  | 0.210618  |
| C                                                                                            | 1.288218  | -0.592168 | -0.374996 |
| C                                                                                            | 2.770718  | 1.350133  | -0.380427 |
| C                                                                                            | 3.640425  | -0.847653 | 0.235652  |
| C                                                                                            | 3.812682  | 0.518969  | 0.024441  |
| C                                                                                            | 2.367915  | -1.375597 | 0.026501  |
| C                                                                                            | 1.519600  | 0.767947  | -0.572635 |
| [Pd(acac) <sub>2</sub> ] $\cdot$ 1,3,5-FIB featuring I $\cdots$ $\eta^2$ (O,O) bifurcated XB |           |           |           |
| I                                                                                            | -4.910589 | -2.997305 | -0.021877 |
| I                                                                                            | 0.286765  | 0.006784  | 0.014812  |
| I                                                                                            | -4.926996 | 2.999967  | 0.007496  |
| F                                                                                            | -1.832663 | -2.324301 | -0.008001 |



|    |           |           |           |
|----|-----------|-----------|-----------|
| F  | -5.883713 | -0.000770 | -0.012601 |
| F  | -1.844678 | 2.344636  | 0.016456  |
| C  | -3.887955 | -1.216342 | -0.010195 |
| C  | -3.894177 | 1.225248  | 0.002130  |
| C  | -1.772121 | 0.010237  | 0.005067  |
| C  | -2.501537 | 1.196497  | 0.007930  |
| C  | -2.495799 | -1.179600 | -0.004288 |
| C  | -4.562765 | 0.002700  | -0.006942 |
| Pd | 4.657714  | -0.006000 | 0.002682  |
| O  | 3.213574  | -1.279136 | 0.032669  |
| O  | 6.044839  | -1.342081 | -0.008866 |
| C  | 3.353006  | -2.549643 | 0.032962  |
| C  | 5.840139  | -2.596538 | -0.002763 |
| C  | 4.579866  | -3.223352 | 0.014759  |
| H  | 4.563445  | -4.318412 | 0.016915  |
| C  | 7.069600  | -3.454198 | -0.015617 |
| H  | 7.074393  | -4.105423 | -0.907417 |
| H  | 7.086172  | -4.116142 | 0.867994  |
| H  | 7.972830  | -2.826181 | -0.018442 |
| C  | 2.069773  | -3.318987 | 0.061050  |
| H  | 1.521134  | -3.085431 | 0.990982  |
| H  | 2.231632  | -4.405708 | -0.002139 |
| H  | 1.420867  | -2.988511 | -0.768663 |
| O  | 6.095987  | 1.272474  | -0.027324 |
| O  | 3.260807  | 1.321669  | 0.012343  |
| C  | 5.940753  | 2.537428  | -0.035244 |
| C  | 3.452648  | 2.581950  | -0.002537 |
| C  | 4.709748  | 3.209025  | -0.025194 |
| H  | 4.722454  | 4.304201  | -0.035113 |
| C  | 2.221046  | 3.436814  | 0.007400  |
| H  | 2.216084  | 4.084672  | 0.901795  |
| H  | 2.212806  | 4.103839  | -0.872461 |
| H  | 1.313728  | 2.814340  | 0.004016  |
| C  | 7.218740  | 3.317217  | -0.056844 |
| H  | 7.805695  | 3.034474  | -0.948359 |
| H  | 7.050824  | 4.404872  | -0.060973 |
| H  | 7.828580  | 3.044565  | 0.822330  |

**Table S9.** Values of the density of all electrons –  $\rho(\mathbf{r})$ , Laplacian of electron density –  $\nabla^2\rho(\mathbf{r})$ , energy density –  $H_b$ , potential energy density –  $V(\mathbf{r})$ , and Lagrangian kinetic energy –  $G(\mathbf{r})$  (a.u.) at the bond critical points (3, –1), corresponding to I···C XB and I··· $\eta^2$ (O,O) bifurcated XB in optimized equilibrium structures of two model supramolecular associates constructed based on the appropriate experimental X-ray geometry of [Pd(acac)<sub>2</sub>]·1,3,5-FIB at 100 K as starting point, bond lengths –  $l$  (Å), as well as energies for these contacts  $E_{\text{int}}$  (kcal/mol), defined by two correlations proposed exclusively for noncovalent interactions involving iodine atoms<sup>†</sup>.

| Contact                                                                                   | $\rho(\mathbf{r})$ | $\nabla^2\rho(\mathbf{r})$ | $H_b$ | $V(\mathbf{r})$ | $G(\mathbf{r})$ | $E_{\text{int}}^a$ | $E_{\text{int}}^b$ | $l$   |
|-------------------------------------------------------------------------------------------|--------------------|----------------------------|-------|-----------------|-----------------|--------------------|--------------------|-------|
| [Pd(acac) <sub>2</sub> ] $\cdot$ 1,3,5-FIB featuring I $\cdots$ C XB                      |                    |                            |       |                 |                 |                    |                    |       |
| I $\cdots$ C                                                                              | 0.010              | 0.033                      | 0.001 | -0.006          | 0.007           | 2.6                | 2.9                | 3.389 |
| [Pd(acac) <sub>2</sub> ] $\cdot$ 1,3,5-FIB featuring I $\cdots\eta^2$ (O,O) bifurcated XB |                    |                            |       |                 |                 |                    |                    |       |
| I $\cdots$ O29                                                                            | 0.010              | 0.039                      | 0.001 | -0.007          | 0.008           | 3.0                | 3.4                | 3.251 |
| I $\cdots$ O14                                                                            | 0.011              | 0.043                      | 0.001 | -0.008          | 0.009           | 3.4                | 3.8                | 3.197 |

<sup>†</sup> The presence of a linear relationship between the energy of noncovalent interactions and electronic properties at the BCP was verified on the set of complexes featuring typical XBs: NH<sub>3</sub> $\cdots$ X-R, H<sub>2</sub>S $\cdots$ X-R, H<sub>2</sub>O $\cdots$ X-R, HCN $\cdots$ X-R, C<sub>2</sub>H<sub>4</sub> $\cdots$ X-R, CO $\cdots$ X-R, where X = Cl, Br, I (for details see Ref.<sup>41</sup> in main text).

$$^a E_{\text{int}} = 0.68(-V(\mathbf{r}))$$

$$^b E_{\text{int}} = E_{\text{int}} = 0.67G(\mathbf{r})$$
